# Supplementary material for: Isolation and Identification of Pathogens Caused Fruit Rot of Zucchini in Inner Mongolia, China
Source: Preprints.org preprint supplement (doi:10.20944/preprints202307.0422.v1), 2023-07-06
Supplement: Supplementary file 1 [file supplementary]

**Table S1.** The accession No. of genes sequenced in this study.

| **Isolate** | **Gene** | **Accession No.** | **Release Date** |
| --- | --- | --- | --- |
| Fx-1a | TEF1-α | OL870950 | 31/01/2024 |
| ITS | OL871487 | 31/01/2024 |
| RPB2 | ON631223 | Available |
| Fx-1b | TEF1-α | OL870951 | 31/01/2024 |
| ITS | OL871488 | 31/01/2024 |
| RPB2 | ON631224 | Available |
